# Supplementary material
Source: Springer Nature journal article supplement (https://www.springermedizin.de/resource/supplementary/12889_2011_4137_MOESM3_ESM.pdf/9492060)

Figure 3: Attitudes regarding social distance and mental illness

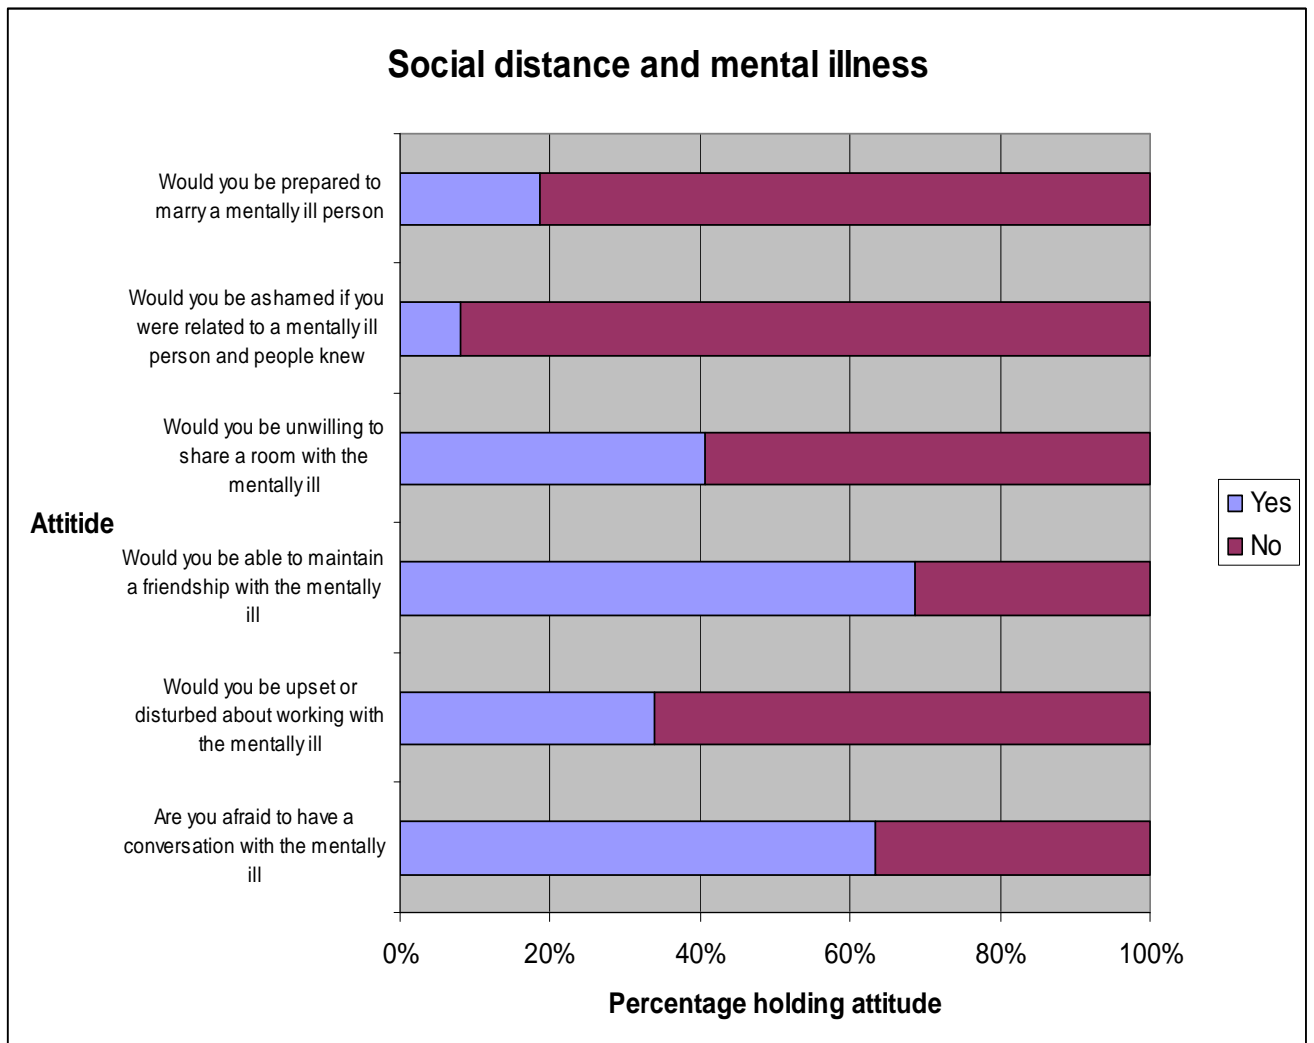

Supplement: MOESM3 [file 9492060]
